# Supplementary material for: Thermodynamic parameters of the pedal motion in the crystal structures of two bromomethylated azobenzenes
Source: Royal Society of Chemistry journal article supplement (doi:10.1039/c5ce00905g), 2015-01-01
Supplement: c5ce00905g2.pdf [file c5ce00905g2.pdf]

Electronic Supplementary Information

**Thermodynamic parameters of the pedal motion in the crystal structures of two bromomethylated azobenzenes**

Christophe M. L. Vande Velde,<sup>a</sup> Matthias Zeller,<sup>b</sup> and Vladimir A. Azov<sup>c</sup>

<sup>a</sup>Faculty of Applied Engineering, University of Antwerp, Salesianenlaan 90, 2660 Hoboken, Belgium;

<sup>b</sup>Youngstown State University, One University Plaza, Youngstown, OH 44555-3663, USA;

<sup>c</sup>University of Bremen, Department of Chemistry, Leobener Str. NW 2C, D-28359 Bremen, Germany.

*Table of Contents*

|                                                                             |          |
|-----------------------------------------------------------------------------|----------|
| Experimental details of x-ray structure determination for compound <b>1</b> | Table S1 |
| Experimental details of x-ray structure determination for compound <b>2</b> | Table S2 |

**Table S1.** Experimental details of x-ray structure determination for compound **1**.

| Temperature (K)                                                                                                | 90                                                             | 120                                          | 150                                        | 180                                        | 210                                          | 250                                          | 270                                        | 300                                          | 330                                       | 375                                       |
|----------------------------------------------------------------------------------------------------------------|----------------------------------------------------------------|----------------------------------------------|--------------------------------------------|--------------------------------------------|----------------------------------------------|----------------------------------------------|--------------------------------------------|----------------------------------------------|-------------------------------------------|-------------------------------------------|
| Crystal data                                                                                                   |                                                                |                                              |                                            |                                            |                                              |                                              |                                            |                                              |                                           |                                           |
| Chemical formula                                                                                               | C <sub>14</sub> H <sub>12</sub> Br <sub>2</sub> N <sub>2</sub> |                                              |                                            |                                            |                                              |                                              |                                            |                                              |                                           |                                           |
| M <sub>r</sub>                                                                                                 | 368.08                                                         |                                              |                                            |                                            |                                              |                                              |                                            |                                              |                                           |                                           |
| Crystal system, Monoclinic, <i>P</i> 2 <sub>1</sub> / <i>c</i> space group                                     |                                                                |                                              |                                            |                                            |                                              |                                              |                                            |                                              |                                           |                                           |
| <i>a</i> , <i>b</i> , <i>c</i> (Å)                                                                             | 13.858 (2),<br>4.3834 (7),<br>11.1513 (17)                     | 13.8531 (19),<br>4.3928 (6),<br>11.1633 (15) | 13.891 (2),<br>4.4024 (7),<br>11.1676 (17) | 13.936 (2),<br>4.4112 (7),<br>11.1717 (16) | 13.9822 (18),<br>4.4209 (6),<br>11.1785 (14) | 14.0179 (18),<br>4.4297 (6),<br>11.1892 (14) | 14.051 (2),<br>4.4406 (6),<br>11.2041 (16) | 14.0837 (18),<br>4.4538 (6),<br>11.2236 (14) | 14.105 (3),<br>4.4657 (10),<br>11.245 (2) | 14.129 (5),<br>4.4805 (14),<br>11.264 (4) |
| β (°)                                                                                                          | 98.584 (2)                                                     | 98.597 (2)                                   | 98.719 (2)                                 | 98.840 (2)                                 | 98.951 (2)                                   | 99.047 (2)                                   | 99.129 (2)                                 | 99.2049<br>(18)                              | 99.262 (3)                                | 99.369 (5)                                |
| <i>V</i> (Å <sup>3</sup> )                                                                                     | 669.81 (18)                                                    | 671.70 (16)                                  | 675.03 (18)                                | 678.62 (17)                                | 682.57 (15)                                  | 686.15 (15)                                  | 690.24 (17)                                | 694.95 (16)                                  | 699.1 (3)                                 | 703.6 (4)                                 |
| <i>Z</i>                                                                                                       | 2                                                              |                                              |                                            |                                            |                                              |                                              |                                            |                                              |                                           |                                           |
| Radiation type                                                                                                 | Mo <i>K</i> α                                                  |                                              |                                            |                                            |                                              |                                              |                                            |                                              |                                           |                                           |
| μ (mm <sup>-1</sup> )                                                                                          | 6.03                                                           | 6.02                                         | 5.99                                       | 5.96                                       | 5.92                                         | 5.89                                         | 5.86                                       | 5.82                                         | 5.78                                      | 5.74                                      |
| Crystal size (mm)                                                                                              | 0.55 × 0.52 × 0.47                                             |                                              |                                            |                                            |                                              |                                              |                                            |                                              |                                           |                                           |
| Data collection                                                                                                |                                                                |                                              |                                            |                                            |                                              |                                              |                                            |                                              |                                           |                                           |
| Diffractometer                                                                                                 | Bruker Smart Apex area detector diffractometer                 |                                              |                                            |                                            |                                              |                                              |                                            |                                              |                                           |                                           |
| Absorption correction                                                                                          | cor-Multi-scan, Bruker SADABS 2008-1                           |                                              |                                            |                                            |                                              |                                              |                                            |                                              |                                           |                                           |
| <i>T</i> <sub>min</sub> , <i>T</i> <sub>max</sub>                                                              | 0.530, 0.746                                                   |                                              |                                            |                                            |                                              |                                              |                                            |                                              |                                           |                                           |
| No. of measured, independent and observed [I > 2σ(I)] reflections                                              | 6248,<br>2091,<br>1867                                         | 6638,<br>2111,<br>1839                       | 6512,<br>2119,<br>1794                     | 6570,<br>2135,<br>1746                     | 7202,<br>2155,<br>1679                       | 7107,<br>2174,<br>1588                       | 7672,<br>2197,<br>1541                     | 6558,<br>2157,<br>1442                       | 6764,<br>2196,<br>1312                    | 7885,<br>2250,<br>1275                    |
| <i>R</i> <sub>int</sub>                                                                                        | 0.025                                                          | 0.025                                        | 0.025                                      | 0.028                                      | 0.029                                        | 0.031                                        | 0.031                                      | 0.023                                        | 0.033                                     | 0.034                                     |
| (sin θ/λ) <sub>max</sub> (Å <sup>-1</sup> )                                                                    | 0.739                                                          | 0.738                                        | 0.738                                      | 0.738                                      | 0.738                                        | 0.739                                        | 0.739                                      | 0.737                                        | 0.735                                     | 0.739                                     |
| Refinement                                                                                                     |                                                                |                                              |                                            |                                            |                                              |                                              |                                            |                                              |                                           |                                           |
| <i>R</i> [ <i>F</i> <sup>2</sup> > 2σ( <i>F</i> <sup>2</sup> )], <i>wR</i> ( <i>F</i> <sup>2</sup> ), <i>S</i> | 0.022,<br>0.055,<br>1.06                                       | 0.022,<br>0.055,<br>1.06                     | 0.025,<br>0.062,<br>1.05                   | 0.027,<br>0.066,<br>1.08                   | 0.028,<br>0.071,<br>1.06                     | 0.030,<br>0.076,<br>1.04                     | 0.031,<br>0.080,<br>1.02                   | 0.039,<br>0.096,<br>1.03                     | 0.035,<br>0.088,<br>1.01                  | 0.032,<br>0.094,<br>1.00                  |
| Fraction of major conformer                                                                                    | 0.963(2)                                                       | 0.969(2)                                     | 0.930(3)                                   | 0.884(3)                                   | 0.834(4)                                     | 0.782(4)                                     | 0.741(4)                                   | 0.718(5)                                     | 0.667(5)                                  | 0.639(4)                                  |
| No. of reflections                                                                                             | 2091                                                           | 2111                                         | 2119                                       | 2135                                       | 2155                                         | 2174                                         | 2197                                       | 2157                                         | 2196                                      | 2250                                      |
| No. of parameters                                                                                              | 111                                                            |                                              |                                            |                                            |                                              |                                              |                                            |                                              |                                           |                                           |
| No. of restraints                                                                                              | 21                                                             |                                              |                                            |                                            |                                              |                                              |                                            |                                              |                                           |                                           |
| H-atom treatment H-atom parameters constrained                                                                 |                                                                |                                              |                                            |                                            |                                              |                                              |                                            |                                              |                                           |                                           |
| Δρ <sub>max</sub> , Δρ <sub>min</sub> (e Å <sup>-3</sup> )                                                     | 0.95,<br>-0.54                                                 | 0.80,<br>-0.49                               | 0.77,<br>-0.47                             | 0.71,<br>-0.40                             | 0.53,<br>-0.39                               | 0.39,<br>-0.36                               | 0.41,<br>-0.34                             | 0.40,<br>-0.47                               | 0.33,<br>-0.34                            | 0.29,<br>-0.30                            |

**Table S2.** Experimental details of x-ray structure determination for compound **2**

|                                                                                                                   |                                                                |                                              |                                              |                                              |                                           |                                          |                                           |
|-------------------------------------------------------------------------------------------------------------------|----------------------------------------------------------------|----------------------------------------------|----------------------------------------------|----------------------------------------------|-------------------------------------------|------------------------------------------|-------------------------------------------|
| Temperature (K)                                                                                                   | 90                                                             | 140                                          | 190                                          | 240                                          | 293                                       | 340                                      | 375                                       |
| Crystal data                                                                                                      |                                                                |                                              |                                              |                                              |                                           |                                          |                                           |
| Chemical formula                                                                                                  | C <sub>14</sub> H <sub>12</sub> Br <sub>2</sub> N <sub>2</sub> |                                              |                                              |                                              |                                           |                                          |                                           |
| M <sub>r</sub>                                                                                                    | 368.08                                                         |                                              |                                              |                                              |                                           |                                          |                                           |
| Crystal system, space group                                                                                       | Monoclinic, <i>P</i> 2 <sub>1</sub> / <i>c</i>                 |                                              |                                              |                                              |                                           |                                          |                                           |
| <i>a</i> , <i>b</i> , <i>c</i> (Å)                                                                                | 12.9324 (11),<br>4.4704 (4),<br>11.5909 (10)                   | 12.9484 (15),<br>4.4854 (5),<br>11.6092 (13) | 12.9648 (11),<br>4.5026 (4),<br>11.6333 (10) | 12.9974 (15),<br>4.5160 (5),<br>11.6594 (13) | 13.035 (10),<br>4.527 (4),<br>11.687 (10) | 13.061 (3),<br>4.5482 (9),<br>11.736 (2) | 13.097 (4),<br>4.5652 (15),<br>11.779 (4) |
| β (°)                                                                                                             | 102.592 (1)                                                    | 102.5452 (14)                                | 102.499 (1)                                  | 102.481 (2)                                  | 102.573 (10)                              | 102.463 (3)                              | 102.471 (5)                               |
| <i>V</i> (Å <sup>3</sup> )                                                                                        | 653.99 (10)                                                    | 658.15 (13)                                  | 663.00 (10)                                  | 668.19 (13)                                  | 673.1 (10)                                | 680.7 (2)                                | 687.7 (4)                                 |
| Z                                                                                                                 | 2                                                              |                                              |                                              |                                              |                                           |                                          |                                           |
| Radiation type                                                                                                    | Mo <i>K</i> α                                                  |                                              |                                              |                                              |                                           |                                          |                                           |
| μ (mm <sup>-1</sup> )                                                                                             | 6.18                                                           | 6.14                                         | 6.10                                         | 6.05                                         | 6.00                                      | 5.94                                     | 5.88                                      |
| Crystal size (mm)                                                                                                 | 0.55 × 0.34 × 0.17                                             |                                              |                                              |                                              |                                           |                                          |                                           |
| Data collection                                                                                                   |                                                                |                                              |                                              |                                              |                                           |                                          |                                           |
| Diffractometer                                                                                                    | Bruker Smart 1000 area detector diffractometer                 |                                              |                                              |                                              |                                           |                                          |                                           |
| Absorption correction                                                                                             | Multi-scan, SADABS2008/1                                       |                                              |                                              |                                              |                                           |                                          |                                           |
| <i>T</i> <sub>min</sub> , <i>T</i> <sub>max</sub>                                                                 | 0.250, 0.746                                                   | 0.249, 0.746                                 | 0.253, 0.746                                 | 0.248, 0.746                                 | 0.362, 0.746                              | 0.255, 0.746                             | 0.273, 0.746                              |
| No. of measured, independent and observed [ <i>I</i> > 2σ( <i>I</i> )] reflections                                | 14059,<br>2062,<br>1933                                        | 7391,<br>2156,<br>1907                       | 14654,<br>2170,<br>1908                      | 7535,<br>2184,<br>1705                       | 15300,<br>2211,<br>1684                   | 7724,<br>2224,<br>1373                   | 15439,<br>2239,<br>1472                   |
| <i>R</i> <sub>int</sub>                                                                                           | 0.040                                                          | 0.041                                        | 0.043                                        | 0.043                                        | 0.044                                     | 0.045                                    | 0.046                                     |
| (sin θ/λ) <sub>max</sub> (Å <sup>-1</sup> )                                                                       | 0.722                                                          | 0.744                                        | 0.746                                        | 0.745                                        | 0.714                                     | 0.744                                    | 0.741                                     |
| Refinement                                                                                                        |                                                                |                                              |                                              |                                              |                                           |                                          |                                           |
| <i>R</i> [ <i>F</i> <sup>2</sup> > 2σ( <i>F</i> <sup>2</sup> )],<br><i>wR</i> ( <i>F</i> <sup>2</sup> ), <i>S</i> | 0.027,<br>0.073,<br>1.063                                      | 0.029,<br>0.078,<br>1.05                     | 0.032,<br>0.085,<br>1.10                     | 0.034,<br>0.089,<br>1.02                     | 0.038,<br>0.109,<br>1.08                  | 0.039,<br>0.112,<br>0.97                 | 0.045,<br>0.127,<br>1.10                  |
| Fraction of major conformer                                                                                       | 0.768(3)                                                       | 0.771(3)                                     | 0.778(4)                                     | 0.732(4)                                     | 0.686(4)                                  | 0.645(5)                                 | 0.632(5)                                  |
| No. of reflections                                                                                                | 2062                                                           | 2156                                         | 2170                                         | 2184                                         | 2211                                      | 2224                                     | 2239                                      |
| No. of parameters                                                                                                 | 110                                                            |                                              |                                              |                                              |                                           |                                          |                                           |
| No. of restraints                                                                                                 | 17                                                             |                                              |                                              |                                              |                                           |                                          |                                           |
| H-atom treatment                                                                                                  | H-atom parameters constrained                                  |                                              |                                              |                                              |                                           |                                          |                                           |
| Δρ <sub>max</sub> , Δρ <sub>min</sub> (e Å <sup>-3</sup> )                                                        | 0.63, -0.94                                                    | 0.47, -0.93                                  | 0.47, -0.93                                  | 0.38, -0.86                                  | 0.39, -0.84                               | 0.30, -0.63                              | 0.30, -0.52                               |
